# Supplementary material
Source: PubMed Central journal article supplement (PMC3985915)
Supplement: ja410934b_si_001.pdf [file ja410934b_si_001.pdf]

## SUPPLEMENTAL INFORMATION

### **The Dynamic Character of the *BCL2* Promoter i-Motif Provides a Mechanism for Modulation of Gene Expression by Compounds That Bind Selectively to the Alternative DNA Hairpin Structure**

Samantha Kendrick,<sup>1†</sup> Hyun-Jin Kang,<sup>2†</sup> Mohammad P. Alam,<sup>4,5</sup> Manikandadas M. Madathil,<sup>4,5</sup>  
Prashansa Agrawal,<sup>2</sup> Vijay Gokhale, Danzhou Yang,<sup>1-3</sup> Sidney M. Hecht,<sup>4,5</sup> and Laurence H.  
Hurley<sup>1-3\*</sup>

<sup>1</sup>Arizona Cancer Center, University of Arizona, Tucson, Arizona 85724

<sup>2</sup>College of Pharmacy, University of Arizona, Tucson, Arizona 85721

<sup>3</sup>BIO5 Institute, University of Arizona, Tucson, Arizona 85721

<sup>4</sup>Center for BioEnergetics, Biodesign Institute, Arizona State University, Tempe, Arizona 85287

<sup>5</sup>Department of Chemistry and Biochemistry, Arizona State University, Tempe, Arizona 85287

<sup>†</sup>These authors both contributed equally to this paper.

\*Address correspondence to this author:

Telephone: (520) 626-5622

Fax: (520) 626-0035

E-mail: hurley@pharmacy.arizona.edu

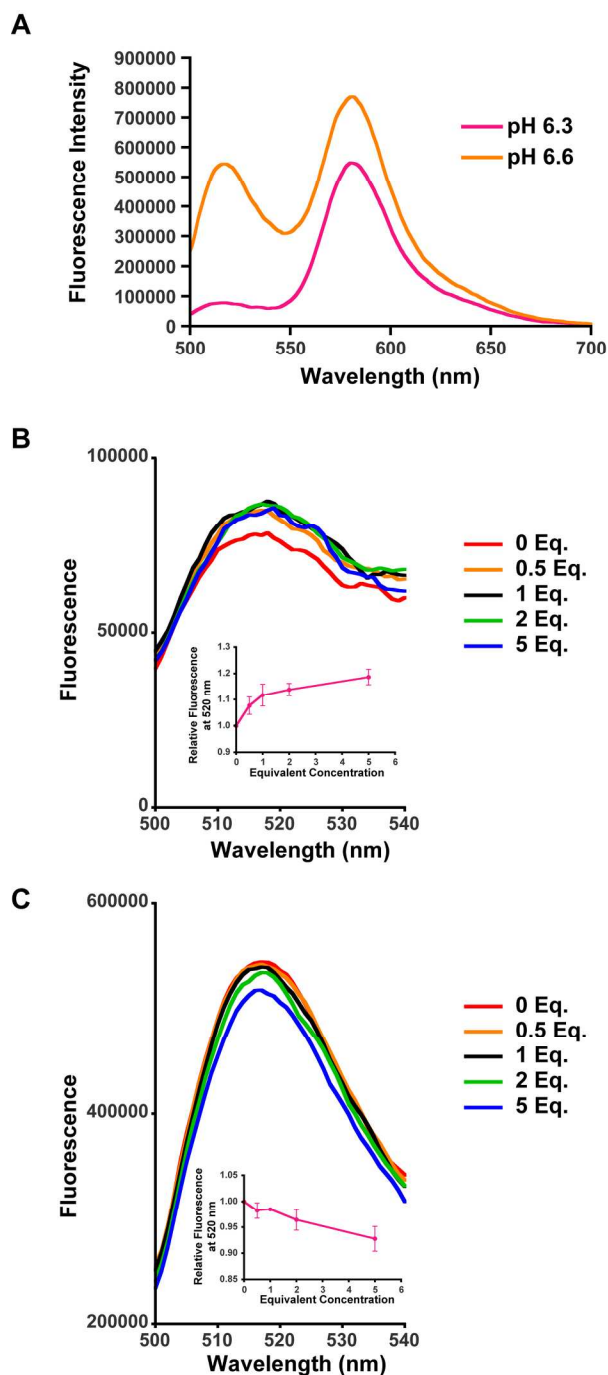

**Supplemental Figure 1.** Fluorescence spectra analysis to confirm the conformational change of the *BCL2* i-motif produced by IMC-76 and IMC48. (A) pH-dependent FRET changes in the *BCL2* i-motif labeled with FAM at the 5'-end and TAMRA at the 3'-end of the oligomer. At low pH (pH 6.3), the  $I_{580}/I_{520}$  ratio is 7.45, showing a closer distance between two dyes by folding the i-motif, while at high pH (pH 6.6) the  $I_{580}/I_{520}$  ratio is 1.45, showing a longer distance between two dyes by unfolding the i-motif. (B) Dose-dependent spectra change by IMC-76 at pH 6.3,  $I_{580}$ . (C) Dose-dependent spectra change by IMC-48 at pH 6.6,  $I_{580}$ . Insets in (B) and (C) show a graph of the dose response from the spectral analysis at  $I_{580}$ . A PTI fluorometer was used to measure the spectra.

### IMC-48

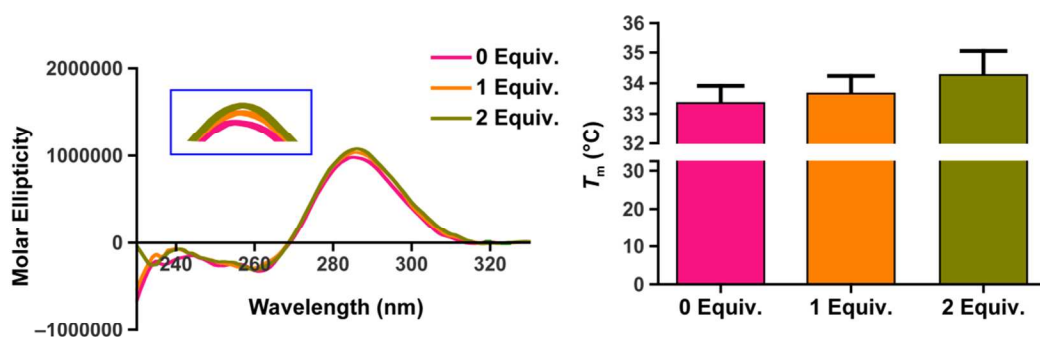

### IMC-76

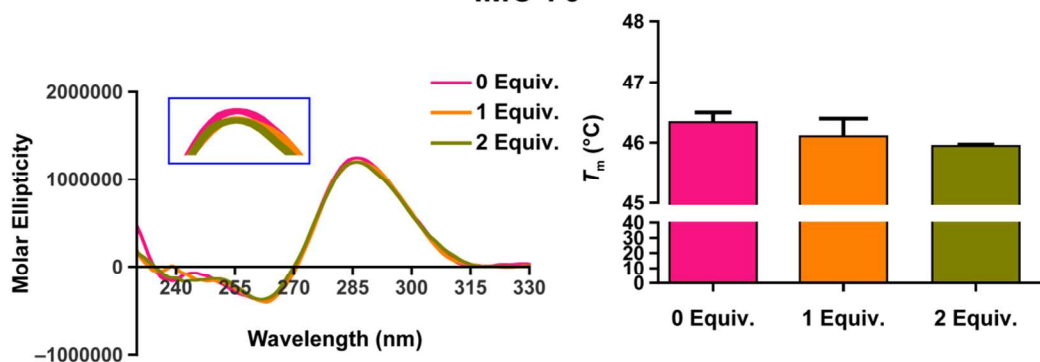

**Supplemental Figure 2.** CD spectra of the BCL2 i-motif with IMC-48 and IMC-76. IMC-48 and IMC-76 were incubated with the DNA at 50 mM Na cacodylate buffer (pH 6.6 and pH 6.3, respectively). The ellipticity at 286 nm was monitored with 1 °C/min of temperature increase for melting analysis, and then sigmoidal curve fitting was used to calculate  $T_m$ . DMSO was treated as a control.

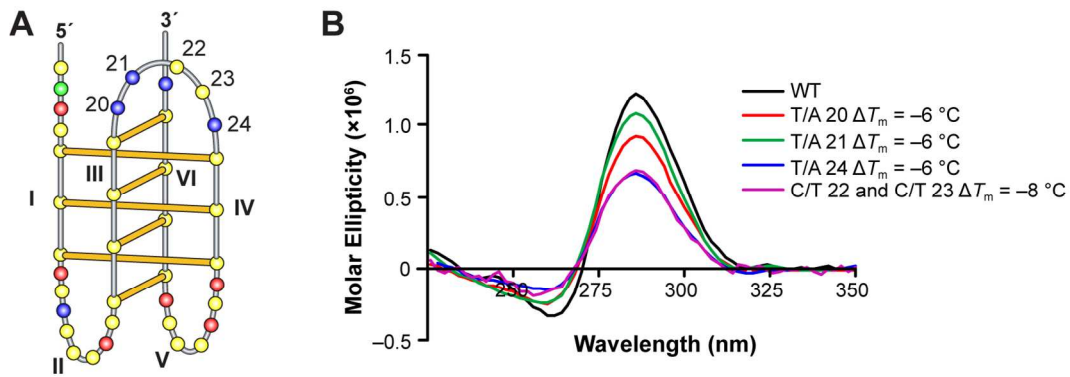

**Supplemental Figure 3.** CD spectral and thermal stability analyses of capping mutants. (A) Folding pattern of the *BCL-2* i-motif with the capping structure nucleotides labeled. (B) CD spectra of the *BCL-2* i-motif capping mutants C22, C23, T20, T21, and T24 in comparison to the wild-type sequence.

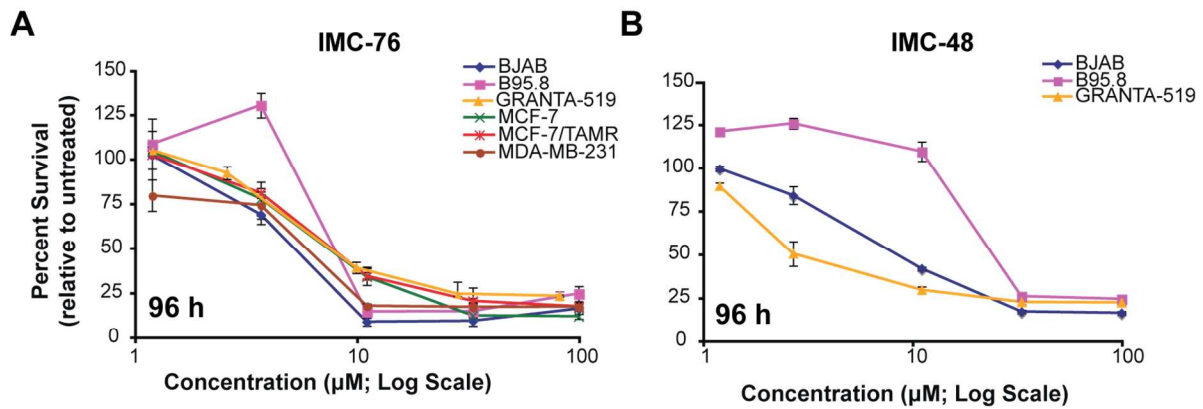

**Supplemental Figure 4.** Effect of IMC-76 and IMC-48 on cell toxicity in lymphoma and breast cancer cell lines. Percent survival determined by the MTS cytotoxicity assay in response to treatment with IMC-76 (A) for BJAB, B95.8, and GRANTA-519 lymphoma and MCF-7, MCF-7/TAMR, and MDA-MB-231 breast cancer cell lines or IMC-48 (B) for BJAB and B95.8 lymphoma cell lines at 96 h. Percent survival was calculated relative to untreated controls from three independent experiments.

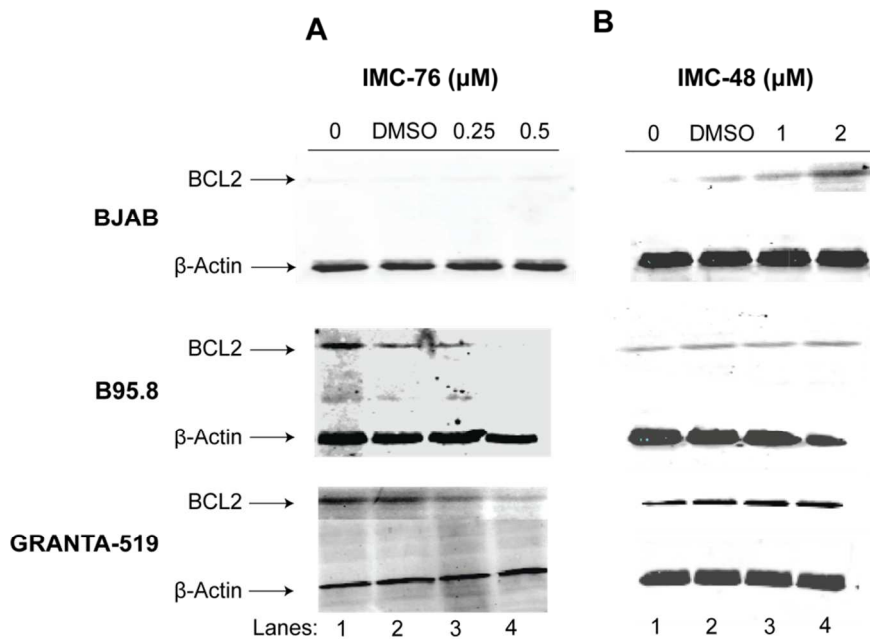

**Supplemental Figure 5.** Effect of IMC-76 and IMC-48 on BCL-2 protein levels in lymphoma cell lines. Western blot analysis of BCL-2 protein levels in BJAB, B95.8, and GRANTA-519 cell lines following 24 h treatment with IMC-76 (A) or IMC-48 (B). In both (A) and (B), lanes 1 and 2, represent untreated and DMSO vehicle cell lysates, respectively. In (A), lanes 3 and 4 contain lysates from cells treated with 0.25 and 0.5 μM IMC-76, respectively. In (B), lanes 3 and 4 contain lysates from cells treated with 1 and 2 μM IMC-48, respectively. The western blots are representative of three independent experiments with β-actin as a loading control.

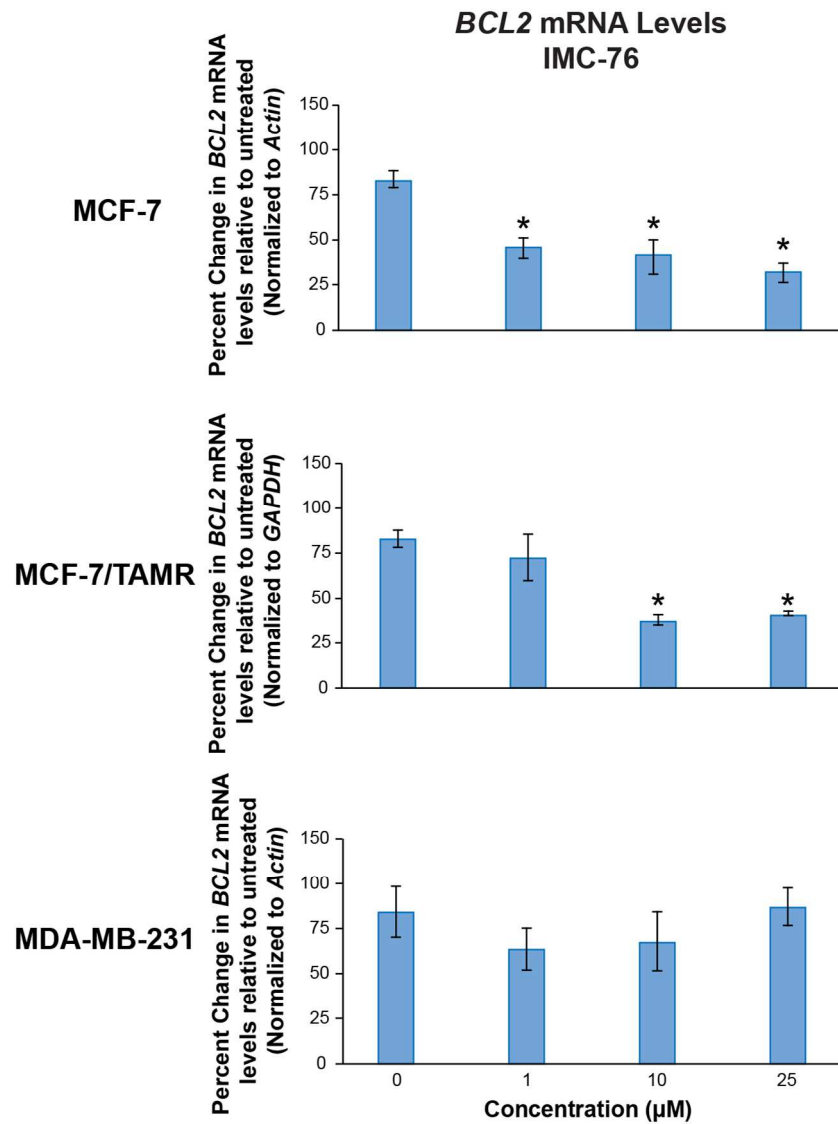

**Supplemental Figure 6.** Effect of IMC-76 on *BCL2* mRNA levels in breast carcinoma cell lines. The *BCL2* mRNA levels as determined by qPCR for MCF-7, MCF-7/TAMR and MDA-MB-231 breast carcinoma cell lines following 24 h treatment with IMC-76. Percent change in mRNA levels were calculated relative to untreated controls. MCF-7 and MDA-MB-231 *BCL-2* mRNA levels were normalized to  $\beta$ -actin and MCF-7/TAMR levels were normalized to *GAPDH*. \* $P \leq 0.02$ .

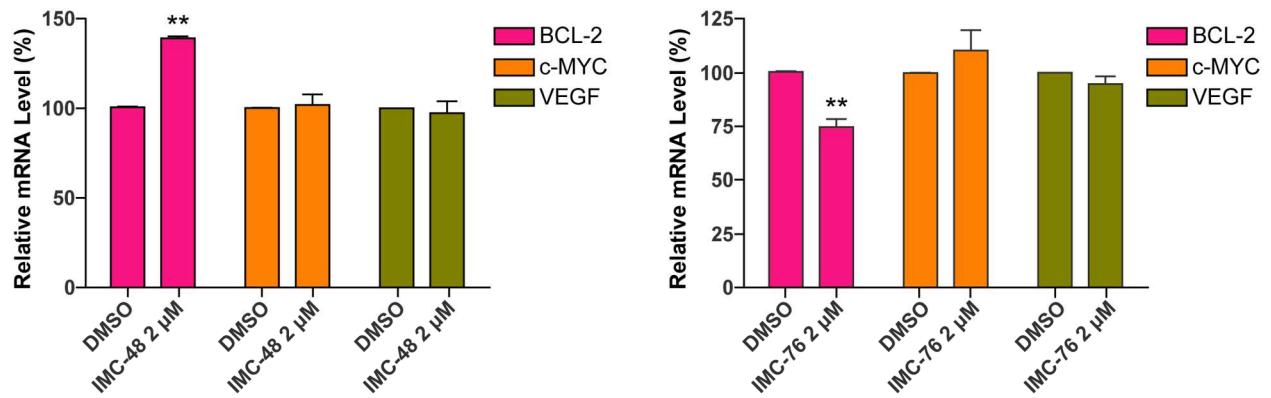

**Supplemental Figure 7.** Effect of IMC-48 and IMC-76 on the mRNA levels of BCL2, c-MYC, and VEGF. A BJAB cell line with a low basal level of BCL2 mRNA (left panel) and an MCF-7 cell line with a high basal level of BCL2 mRNA (right panel) were used for IMC-48 and IMC-76, respectively. Cells were treated for 24 h with compounds and DMSO served as a control. Relative mRNA level was determined by normalization of Ct values to GAPDH and the DMSO by qPCR assay.



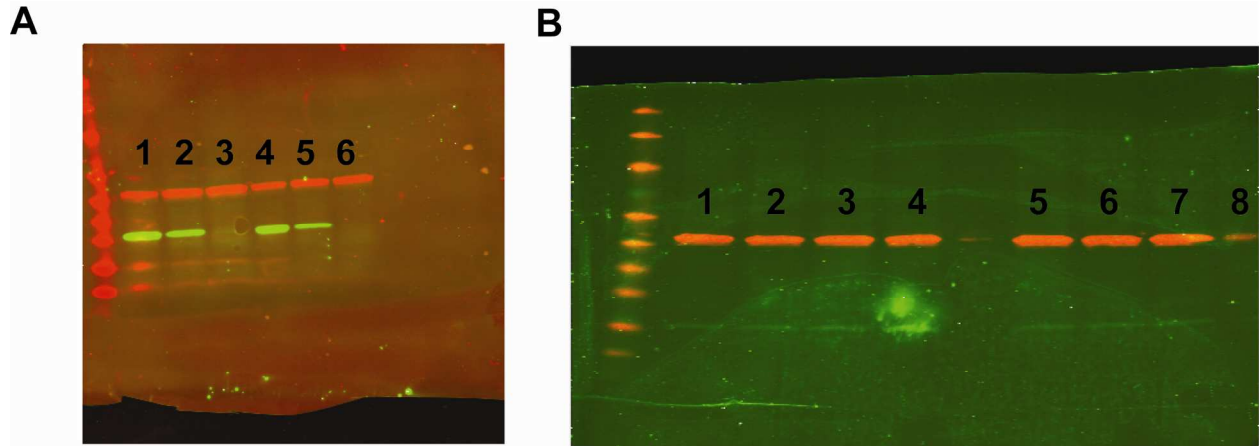

**Supplemental Figure 8.** Uncut western blot gels. (A) Western blot gel of basal BCL2 protein levels from GRANTA-519 (lanes 1 and 4), B95.8 (lanes 2 and 5), and BJAB (lanes 3 and 6) cell line lysates shown in Figure 5B. (B) Western blot gel of BJAB cells following 24 h treatment with IMC-76 from Supplemental Figure 5. Lanes 1 and 5 and lanes 2 and 6 represent untreated and DMSO vehicle cell lysates, respectively. Lanes 3 and 7 and lanes 4 and 8 contain lysates from cells treated with 0.25 and 0.5  $\mu$ M IMC-76, respectively. The lysates represent two of three independent experiments with  $\beta$ -actin as a loading control.

**Supplemental Table 1.** Sequences of *BCL2* FRET and NdU probes.

| <b>DNA Probe</b>               | <b>Sequence (5' → 3')</b>                                                         |
|--------------------------------|-----------------------------------------------------------------------------------|
| <i>BCL2</i><br>i-motif for HTS | FAM-CAG <b>CCCCGCTCCCGCCCCCTTCCTCCCGCGCCCGCCCCT</b> -<br>BHQ                      |
| <i>BCL2</i><br>i-motif         | FAM-CAG <b>CCCCGCTCCCGCCCCCTTCCTCCCGCGCCCGCCCCT</b> -<br>TAMRA                    |
| <i>BCL2</i> i-motif<br>mutant  | FAM -CAG <b>TTTTGCTCCCGCTTTC</b> TTCCT <b>TTT</b> GCG <b>CCCGCCCCT</b> -<br>TAMRA |
| <i>BCL2</i><br>G-quadruplex    | FAM-AG <b>GGGCGGGCGCGGGAGGAAGGGGGCGGGAGCGGGGCTG</b> -<br>TAMRA                    |
| <i>c-MYC</i><br>i-motif        | FAM- TCCCCACCTTCCCCACCCTCCCCACCCTCCCCA-TAMRA                                      |
| <i>VEGF</i><br>i-motif         | FAM-CTCCG <b>CCCCGCCGGGACCCCGCCCCCGGCCCGCCCC</b> -TAMRA                           |
| 20T                            | CAG <b>CCCCGCTCCCGCCCCC</b> Nd <b>UTCCTCCCGCGCCCGCCCCT</b>                        |
| 21T                            | CAG <b>CCCCGCTCCCGCCCCCT</b> Nd <b>UCCTCCCGCGCCCGCCCCT</b>                        |
| 24T                            | CAG <b>CCCCGCTCCCGCCCCCTTCC</b> Nd <b>UCCCGCGCCCGCCCCT</b>                        |
| 39T                            | CAG <b>CCCCGCTCCCGCCCCCTTCCTCCCGCGCCCGCCCC</b> Nd <b>U</b>                        |

**Supplemental Table 2.** Structures and FRET values for steroidal compounds from the NCI Diversity Set and ChemDiv library.

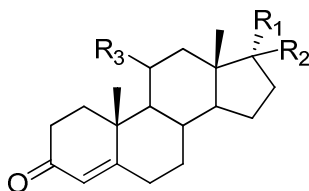

| Compound # | R <sub>1</sub>      | R <sub>2</sub>                        | R <sub>3</sub> | % Increase in FRET value compared to probe (set to 100 %) (10 equivalent compared to DNA) |
|------------|---------------------|---------------------------------------|----------------|-------------------------------------------------------------------------------------------|
| IMC-76     | -                   | -                                     | -              | 270                                                                                       |
| IMC-48     | -                   | -                                     | -              | 52                                                                                        |
| 5829-8948  | -OH                 | -H                                    | -H             | 200.3                                                                                     |
| N050-0008  | -OCOCH <sub>3</sub> | -H                                    | -H             | 163.0                                                                                     |
| N050-0013  | -OH                 | -COCH <sub>3</sub>                    | -H             | 213.0                                                                                     |
| N050-0014  | -OH                 | -COCH <sub>2</sub> OH                 | -H             | 177.3                                                                                     |
| 5776-0002  | -OCOCH <sub>3</sub> | -COCH <sub>2</sub> OCOCH <sub>3</sub> | -H             | 234.6                                                                                     |
| N050-0017  | -OH                 | -COCH <sub>2</sub> OH                 | =O             | 190.4                                                                                     |
| N056-0002  | -OCOCH <sub>3</sub> | -COCH <sub>2</sub> OH                 | -OH            | 183.0                                                                                     |
| N056-0003  | -OCOCH <sub>3</sub> | -COCH <sub>2</sub> OCOCH <sub>3</sub> | -OH            | 181.0                                                                                     |

**Analysis of structure and FRET values:** IMC-76 was identified from the NCI Diversity Set and shows a FRET value of 270. It is a steroidal molecule predominantly substituted on ring D at C17. Screening of similar steroidal molecules from the ChemDiv collection resulted in identification of compounds that exert a similar effect on FRET: an increase indicating destabilization of the BCL2 i-motif. Although definite conclusions cannot be drawn about structure–activity relationships (SAR), activity trend was observed for steroidal compounds with C17 substitution. A detailed SAR would require design, synthesis, and testing of analogs; hence this would be a part of future studies on these compounds.

**Supplemental Table 3.** IMC-76 and IMC-48 IC<sub>50</sub> values at 96 h for breast carcinoma and lymphoma cell lines as determined by the MTS cytotoxicity assay.

| Cell Line  | IC <sub>50</sub> (μM) |               |
|------------|-----------------------|---------------|
|            | IMC-76 (96 h)         | IMC-48 (96 h) |
| MCF-7      | 9.4                   | ND            |
| MCF-7/TAMR | 9.4                   | ND            |
| MDA-MB-231 | 5.8                   | ND            |
| BJAB       | 5.2                   | 8.4           |
| B95.8      | 7.9                   | 24.2          |
| GRANTA-519 | 8.4                   | 2.7           |

ND: not determined
